# Supplementary material for: Libertad de cátedra
Source: MDPI journal article supplement (doi:10.3390/plants12010099), 1988-01-01

## Supporting Information

### Chemical and Biological Evaluation of Amazonian Medicinal Plant *Vouacapoua americana* Aubl.

**Serhat Sezai Çiçek <sup>1,\*</sup>, Anna Laís Pfeifer Barbosa <sup>1</sup>, Arlette Wenzel-Storjohann <sup>2</sup>, Jorge Federico Orellana Segovia <sup>3</sup>, Roberto Messias Bezerra <sup>4</sup>, Frank Sönnichsen <sup>5</sup>, Christian Zidorn <sup>1</sup>, Isamu Kanzaki <sup>6</sup> and Deniz Tasdemir <sup>2,7</sup>**

*1 Department of Pharmaceutical Biology, Kiel University, Gutenbergstr. 76, 24118 Kiel, Germany*

*2 Research Unit Marine Natural Products Chemistry, GEOMAR Centre for Marine Biotechnology (GEOMAR-Biotech), GEOMAR Helmholtz Centre for Ocean Research Kiel, Am Kiel-Kanal 44, 24106 Kiel, Germany*

*3 Ecoregional Research Unit, Brazilian Agricultural Research Corporation, Rod. JK, Km 5, Macapá, 68903-419 Amapá, Brazil*

*4 Laboratory of Bioprospection and Atomic Absorption, Federal University of Amapá, Rod. JK, Macapá, 68903-419 Amapá, Brazil*

*5 Otto Diels Institute for Organic Chemistry, Kiel University, Otto-Hahn-Platz 4, 24118 Kiel, Germany*

*6 Laboratory of Bioprospection, Darcy Ribeiro Campus, University of Brasilia, 70910-900 Brasilia, DF, Brazil*

*7 Kiel University, Christian-Albrechts-Platz 4, 24118 Kiel, Germany*

\* Corresponding author. E-mail address: [scicek@pharmazie.uni-kiel.de](mailto:scicek@pharmazie.uni-kiel.de).

## List of Contents

|                   |                                                   |
|-------------------|---------------------------------------------------|
| <b>Table S1:</b>  | $^{13}\text{C}$ NMR data of compounds <b>2–5</b>  |
| <b>Table S2:</b>  | $^1\text{H}$ NMR data of compounds <b>2–5</b>     |
| <b>Table S3:</b>  | Cytotoxic effects of compounds <b>1–5</b>         |
| <b>Table S4:</b>  | Antifungal effects of compounds <b>1–5</b>        |
| <b>Table S5:</b>  | Antibacterial effects of compounds <b>1–5</b>     |
| <br>              |                                                   |
| <b>Figure S1:</b> | HRESIMS spectrum of compound <b>1</b>             |
| <b>Figure S2:</b> | $^1\text{H}$ NMR spectrum of compound <b>1</b>    |
| <b>Figure S3:</b> | $^{13}\text{C}$ NMR spectrum of compound <b>1</b> |
| <b>Figure S4:</b> | H,H COSY spectrum of compound <b>1</b>            |
| <b>Figure S5:</b> | HSQC spectrum of compound <b>1</b>                |
| <b>Figure S6:</b> | HMBC spectrum of compound <b>1</b>                |
| <b>Figure S7:</b> | NOESY spectrum of compound <b>1</b>               |

**Table S1**

<sup>13</sup>C NMR data (150.90 MHz) of compounds **2–5** ( $\delta$  in ppm)

| Position         | <b>2</b> <sup>a</sup> | <b>3</b> <sup>b</sup> | <b>4</b> <sup>a</sup> | <b>5</b> <sup>a</sup> |
|------------------|-----------------------|-----------------------|-----------------------|-----------------------|
| 1                | 39.0                  | 40.6                  | 39.9                  | 39.9                  |
| 2                | 19.6                  | 20.0                  | 19.5                  | 19.6                  |
| 3                | 38.1                  | 38.9                  | 37.9                  | 37.9                  |
| 4                | 44.0                  | 44.3                  | 44.0                  | 44.1                  |
| 5                | 56.2                  | 56.5                  | 56.5                  | 56.5                  |
| 6                | 24.1                  | 23.9                  | 23.2                  | 23.4                  |
| 7                | 32.0                  | 31.8                  | 31.9                  | 32.0                  |
| 8                | 41.7                  | 41.9                  | 35.8                  | 35.9                  |
| 9                | 53.5                  | 45.2                  | 45.2                  | 45.2                  |
| 10               | 37.5                  | 38.2                  | 38.1                  | 38.1                  |
| 11               | 21.7                  | 40.2                  | 22.6                  | 22.6                  |
| 12               | 26.8                  | 107.3                 | 149.8                 | 149.8                 |
| 13               | 128.7                 | 175.2                 | 122.4                 | 122.4                 |
| 14               | 137.0                 | 38.7                  | 31.6                  | 31.6                  |
| 15               | 135.7                 | 113.1                 | 109.7                 | 109.7                 |
| 16               | 110.8                 | 172.8                 | 140.5                 | 140.5                 |
| 17               | 16.0                  | 12.9                  | 17.7                  | 17.7                  |
| 18               | 28.9                  | 29.6                  | 29.2                  | 29.1                  |
| 19               | 184.0                 | 181.0                 | 184.1                 | 178.1                 |
| 20               | 12.7                  | 13.6                  | 13.5                  | 13.4                  |
| OCH <sub>3</sub> |                       |                       |                       | 51.4                  |

a) Values were recorded in chloroform-*d*<sub>1</sub>. b) Values were recorded in a mixture (1:1) of chloroform-*d*<sub>1</sub> and methanol-*d*<sub>4</sub>.

**Table S2**

<sup>1</sup>H NMR data (400.33 MHz) of compounds **2**, **3**, **4**, and **5** ( $\delta$  in ppm, *J* in Hz).

| Position | <b>2</b> <sup>a</sup>        | <b>3</b> <sup>b</sup>       | <b>4</b> <sup>a</sup>        | <b>5</b> <sup>a</sup>                        |
|----------|------------------------------|-----------------------------|------------------------------|----------------------------------------------|
| 1        | 0.95 m, 1.86 m               | 1.05 m, 1.77 m              | 1.06 m, 1.80 m               | 1.05 (m), 1.77 (m)                           |
| 2        | 1.50 br d (13.9), 1.89 (m)   | 1.46 m, 1.81 m              | 1.49 m, 1.86 m               | 1.49 (m), 1.84 (m)                           |
| 3        | 1.04 m, 2.17 br d (12.1)     | 1.01 m, 2.14 br d (12.7)    | 1.06 m, 2.20 br d (12.8)     | 1.05 (m), 2.20 (br d, <i>J</i> =16.9 Hz)     |
| 4        |                              |                             |                              |                                              |
| 5        | 1.13 dd (12.1, 3.6)          | 1.11 m                      | 1.16 dd (12.1, 2.1)          | 1.13 (dd, <i>J</i> =14.3, 1.9 Hz)            |
| 6        | 1.94 m (2H)                  | 1.73 m, 1.92 m              | 1.79 m, 1.95 dq (13.7, 2.2)  | 1.69 (m), 1.95 (dq)                          |
| 7        | 0.86 m, 2.23 dq (12.6, 3.2)  | 1.33 m, 1.59 m              | 1.33 dq (9.3, 12.8), 1.75 m  | 1.32 (dq, <i>J</i> = 9.6, 13.1 Hz), 1.75 (m) |
| 8        | 2.02 m                       | 1.58 m                      | 1.75 m                       | 1.74 (m)                                     |
| 9        | 0.89 m                       | 1.46 m                      | 1.48 m                       | 1.46 (m)                                     |
| 10       |                              |                             |                              |                                              |
| 11       | 1.07 dt (13.6, 4.8), 1.84 m  | 1.25 m, 2.40 dd (3.0, 12.9) | 2.36 dd (10.4, 16.6), 2.56 m | 2.38 dd (10.4, 16.5), 2.57 m                 |
| 12       | 2.00 m, 2.33 br d (13.8)     |                             |                              |                                              |
| 13       |                              |                             |                              |                                              |
| 14       |                              | 2.92 m                      | 2.63 m                       | 2.62 m                                       |
| 15       | 6.80 dd (17.3, 11.0)         | 5.63 s                      | 6.18 d (1.6)                 | 6.17 d (1.7)                                 |
| 16       | 4.96 d (11.4), 5.11 d (17.1) |                             | 7.22 d (1.8)                 | 7.21 d (1.7)                                 |
| 17       | 1.75 s                       | 1.13 d (7.9)                | 0.98 d (7.0)                 | 0.97 d (7.0)                                 |
| 18       | 1.23 s                       | 1.19 s                      | 1.28 s                       | 1.21 s                                       |
| 20       | 0.76 s                       | 0.71 s                      | 0.82 s                       | 0.71 s                                       |
| 21       |                              |                             |                              | 3.65 s                                       |

a) Values were recorded in chloroform-*d*<sub>1</sub>. b) Values were recorded in a mixture (1:1) of chloroform-*d*<sub>1</sub> and methanol-*d*<sub>4</sub>.

**Table S3**

Cytotoxic effects of compounds **1–5** at a concentration of 100  $\mu$ M. Effects are given in % growth inhibition. Positive control was doxorubicin.

|                   | HaCaT | A-375 | A-549 | HCT-116 | MB-231 |
|-------------------|-------|-------|-------|---------|--------|
| Compound <b>1</b> | -     | -     | -     | -       | -      |
| Compound <b>2</b> | -     | 38    | -     | 26      | -      |
| Compound <b>3</b> | -     | -     | -     | -       | -      |
| Compound <b>4</b> | -     | -     | -     | -       | -      |
| Compound <b>5</b> | 60    | 62    | -     | 31      | -      |
| 0.5% DMSO         | -     | -     | -     | -       | -      |
| Positive control  | 81    | 93    | 92    | 86      | 92     |

**Table S4**

Antifungal effects of compounds **1–5** at a concentration of 100  $\mu$ M. Effects are given in % growth inhibition. Positive controls were nystatin (*C. albicans*), amphotericin B (*C. neoformans*), and clotrimazol (*T. rubrum*).

|                   | <i>C. albicans</i> | <i>C. neoformans</i> | <i>T. rubrum</i> |
|-------------------|--------------------|----------------------|------------------|
| Compound <b>1</b> | -                  | 35                   | -                |
| Compound <b>2</b> | -                  | -                    | -                |
| Compound <b>3</b> | -                  | 41                   | -                |
| Compound <b>4</b> | -                  | -                    | -                |
| Compound <b>5</b> | -                  | -                    | -                |
| 0.5% DMSO         | -                  | -                    | -                |
| Positive control  | 93                 | 100                  | 99               |

**Table S5**

Antibacterial effects of compounds **1–5** at a concentration of 100  $\mu$ M. Effects are given in % growth inhibition. Positive controls were chloramphenicol (MRSA, *K. pneumoniae*, *E. coli*), ampicillin (*E. faecium*), doxycycline (*A. baumannii*), and polymyxin B (*P. aeruginosa*).

|                   | MRSA | <i>E. faecium</i> | <i>K. pneumoniae</i> | <i>A. baumannii</i> | <i>P. aeruginosa</i> | <i>E. coli</i> |
|-------------------|------|-------------------|----------------------|---------------------|----------------------|----------------|
| Compound <b>1</b> | 31   | -                 | -                    | -                   | -                    | -              |
| Compound <b>2</b> | 80   | -                 | -                    | -                   | -                    | -              |
| Compound <b>3</b> | -    | -                 | -                    | -                   | -                    | -              |
| Compound <b>4</b> | 98   | 92                | -                    | -                   | -                    | -              |
| Compound <b>5</b> | -    | -                 | -                    | -                   | -                    | 21             |
| 0.5% DMSO         | -    | -                 | -                    | -                   | -                    | -              |
| Positive control  | 100  | 100               | 99                   | 100                 | 99                   | 97             |

Fig. S1:  
HRESIMS spectrum  
of compound **1**

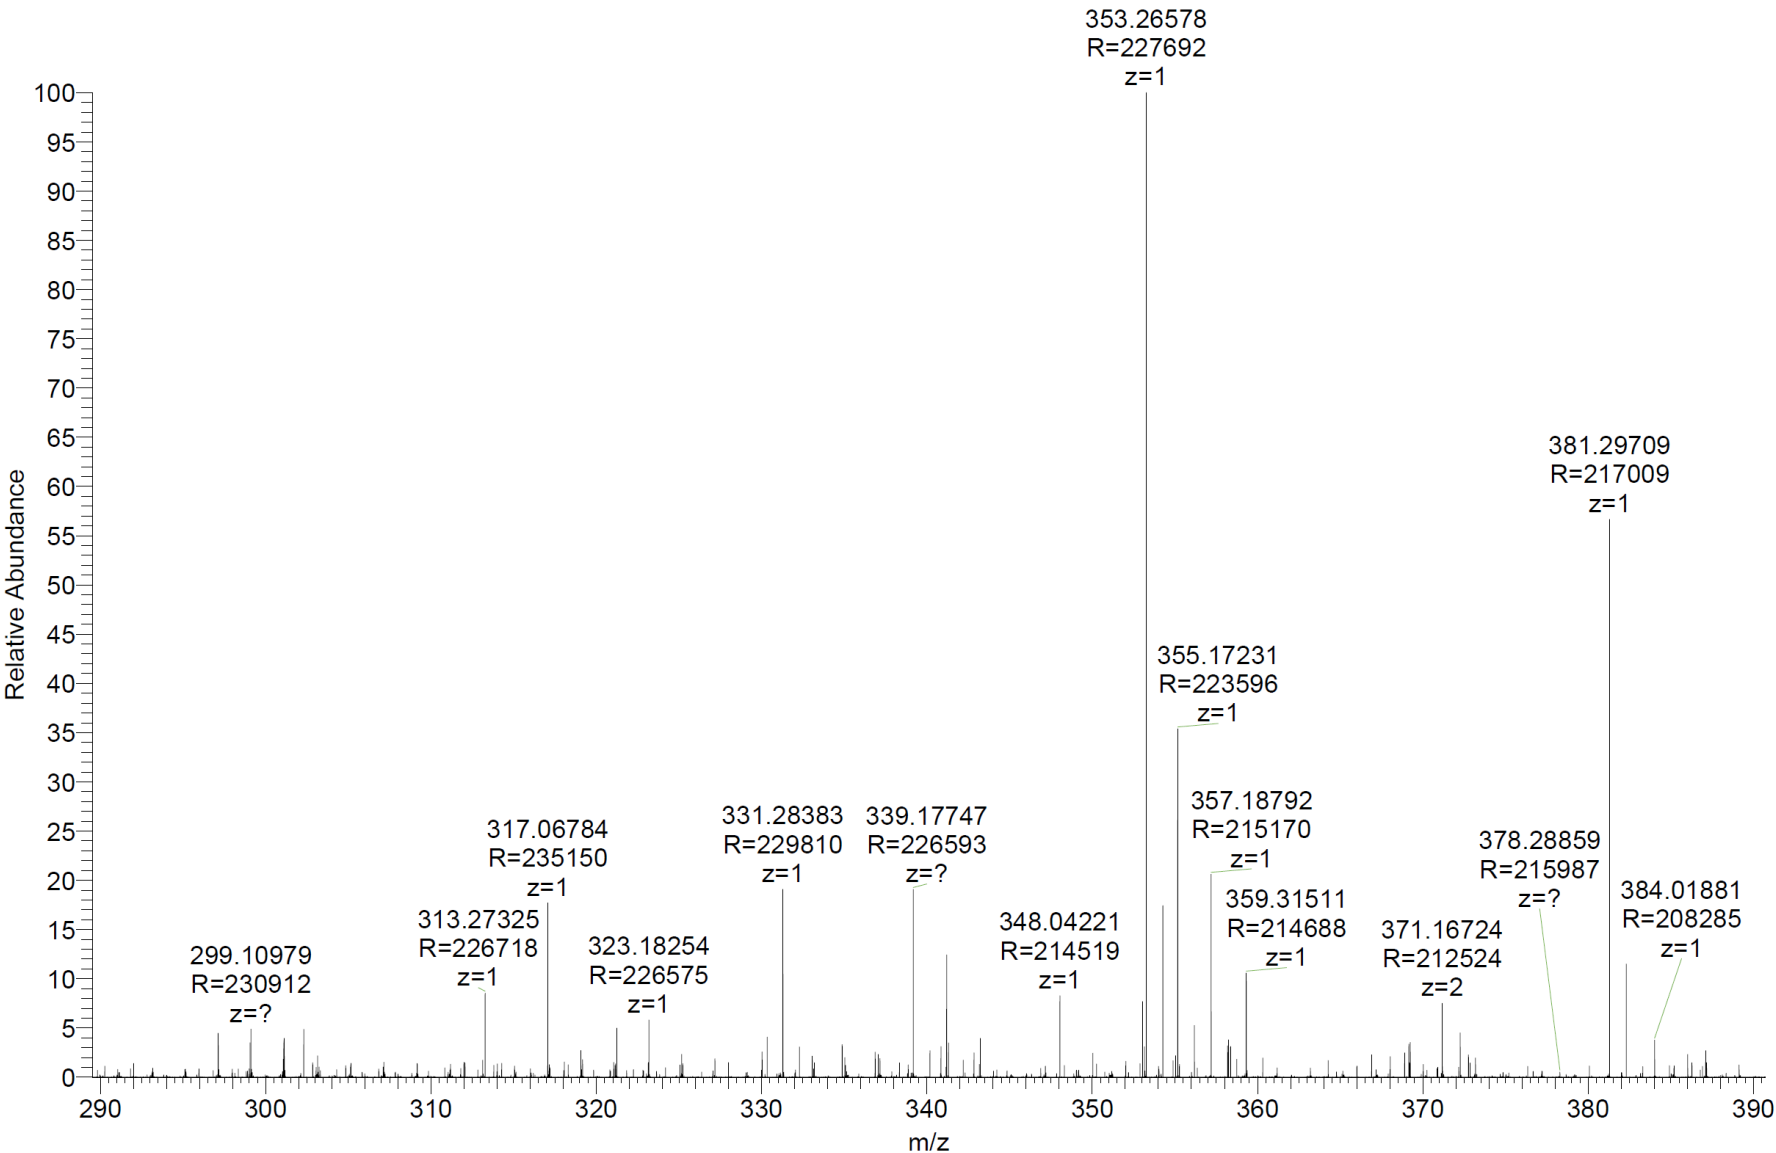

Fig. S2:

$^1\text{H}$  NMR spectrum (600.13 MHz) of compound **1** measured in chloroform- $d_1$

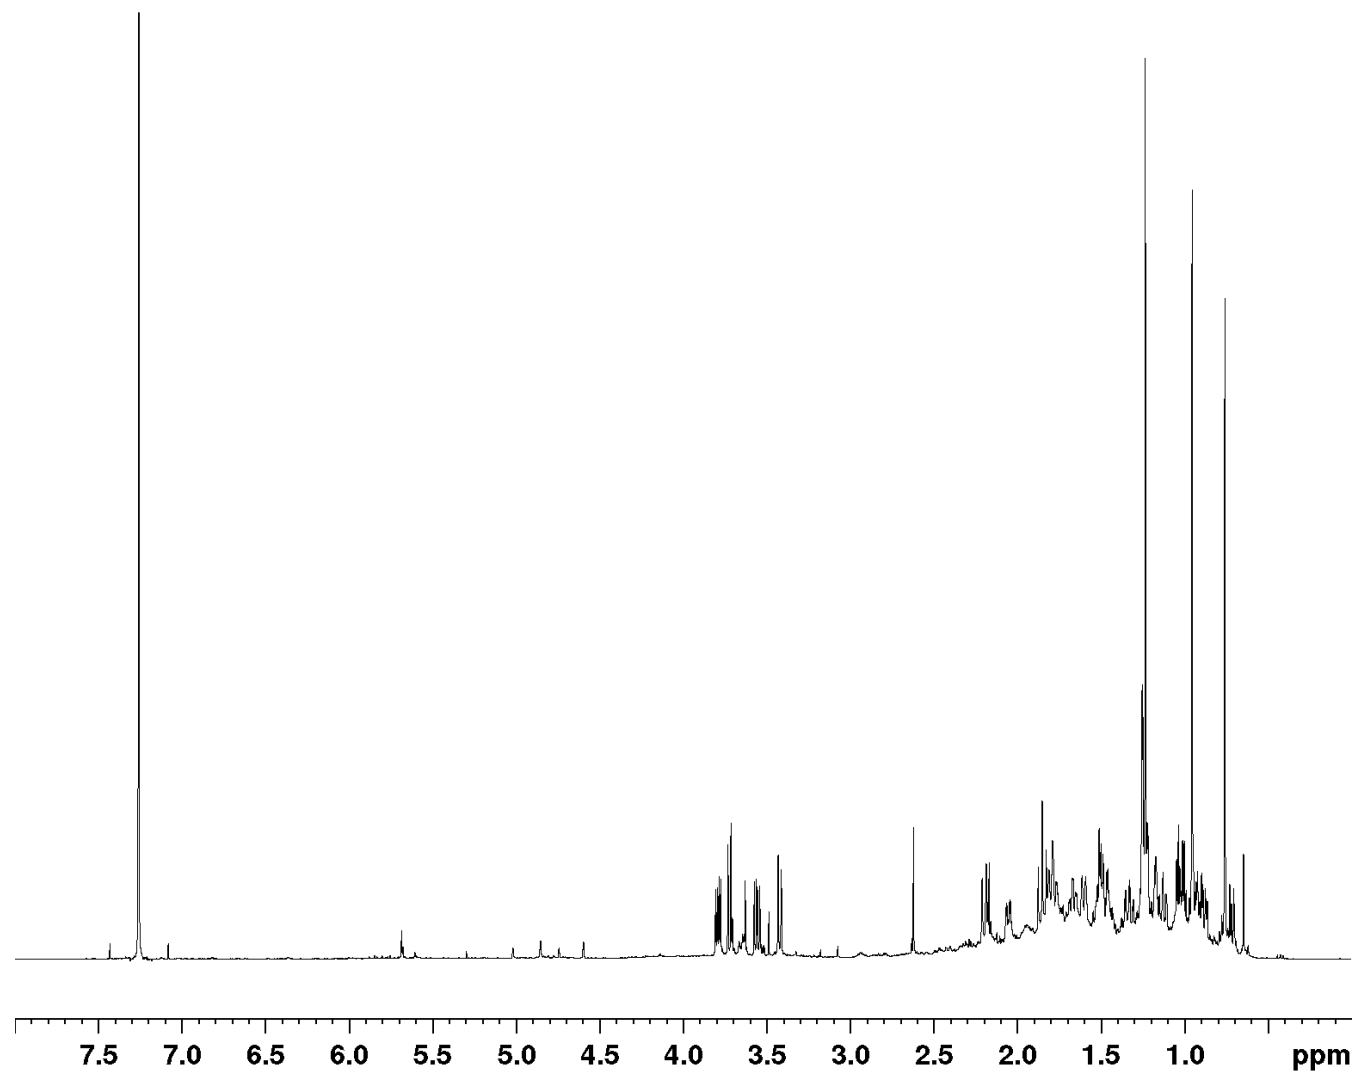

Fig. S3:

$^{13}\text{C}$  NMR (150.90 MHz) spectrum of  
compound **1** measured in chloroform- $d_1$

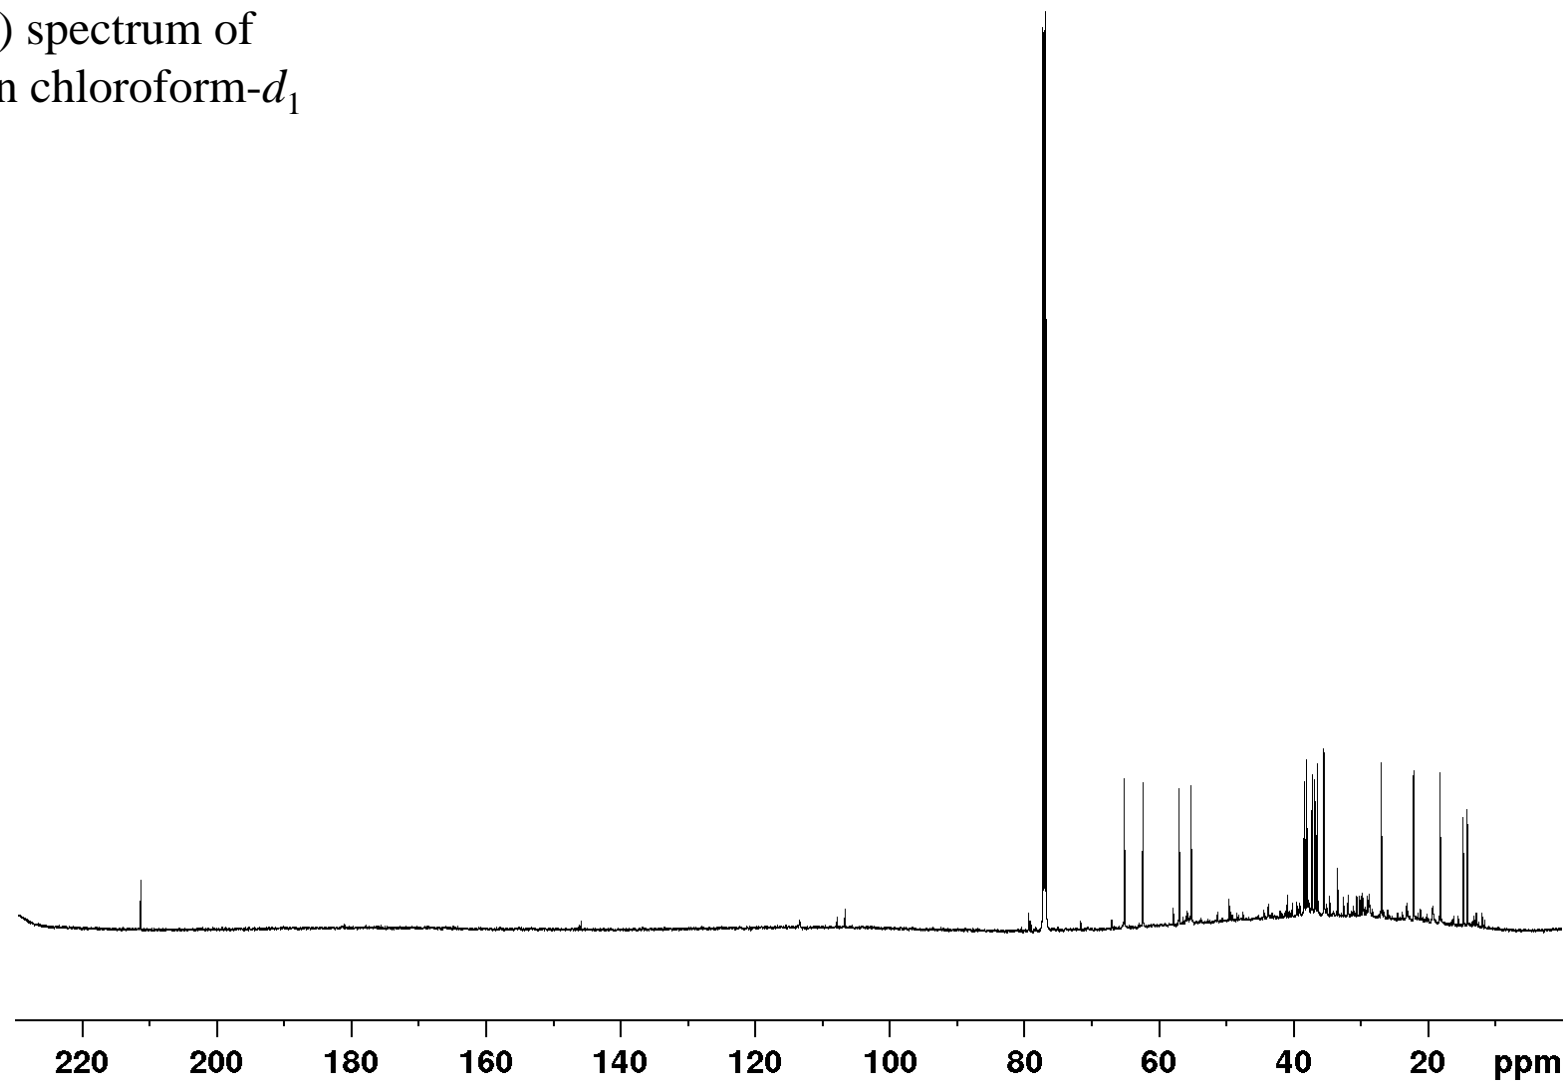

Fig. S4:

H,H COSY spectrum of compound **1**  
measured in chloroform- $d_1$

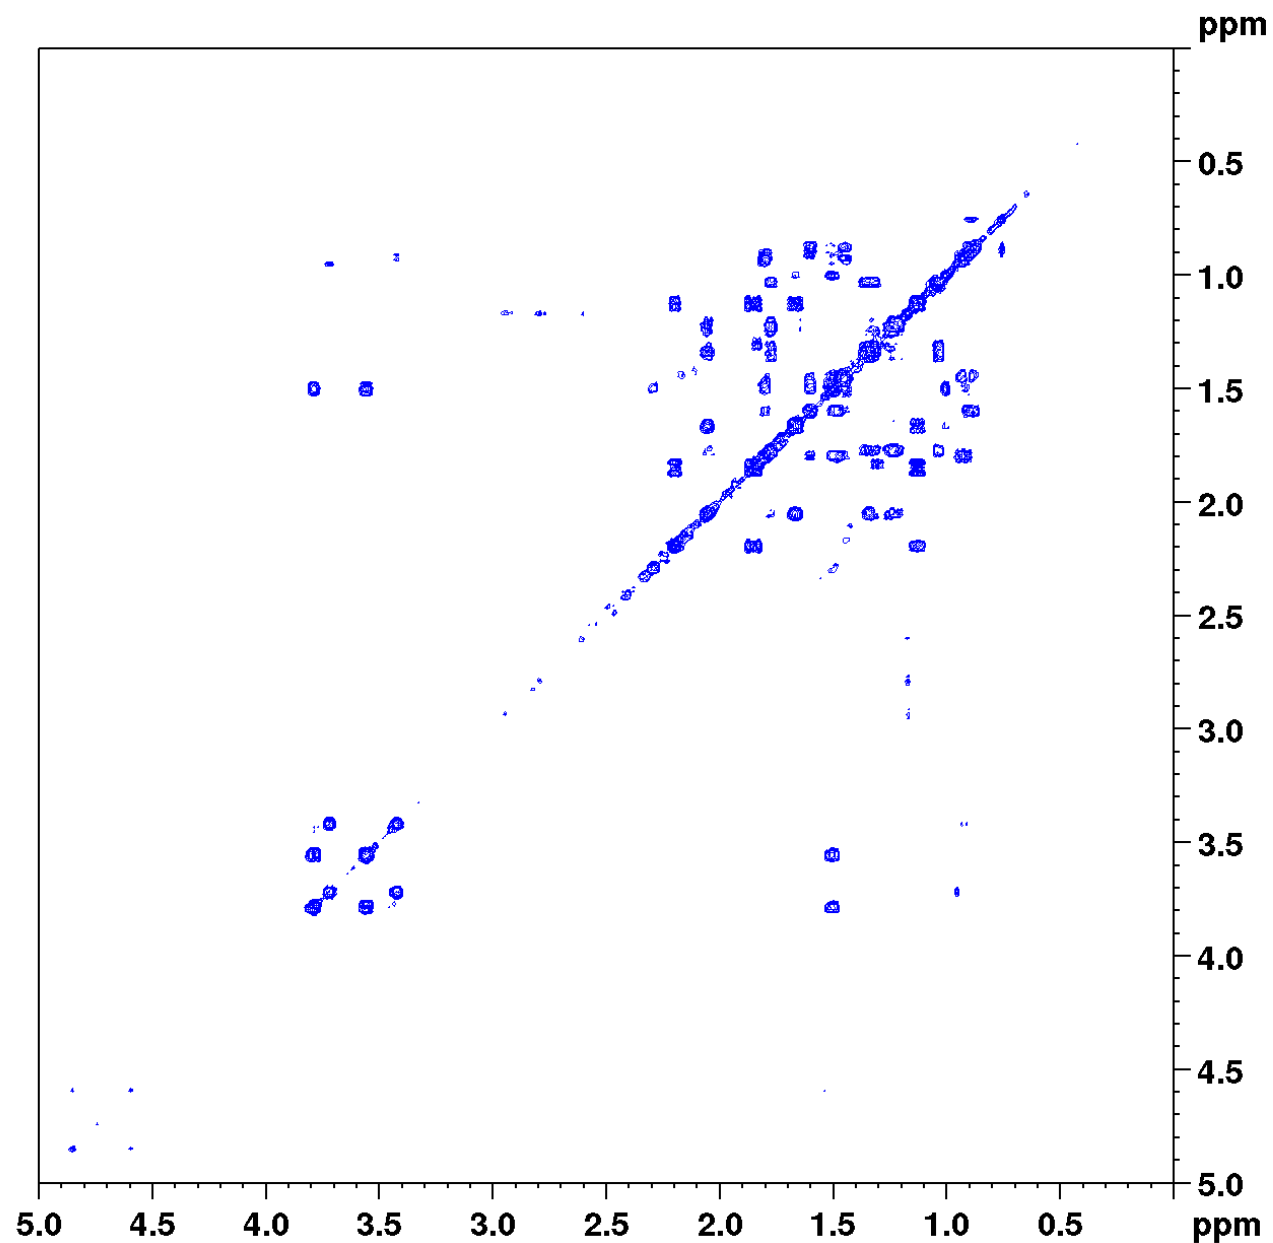

Fig. S5:

HSQC spectrum of compound **1**  
measured in chloroform- $d_1$

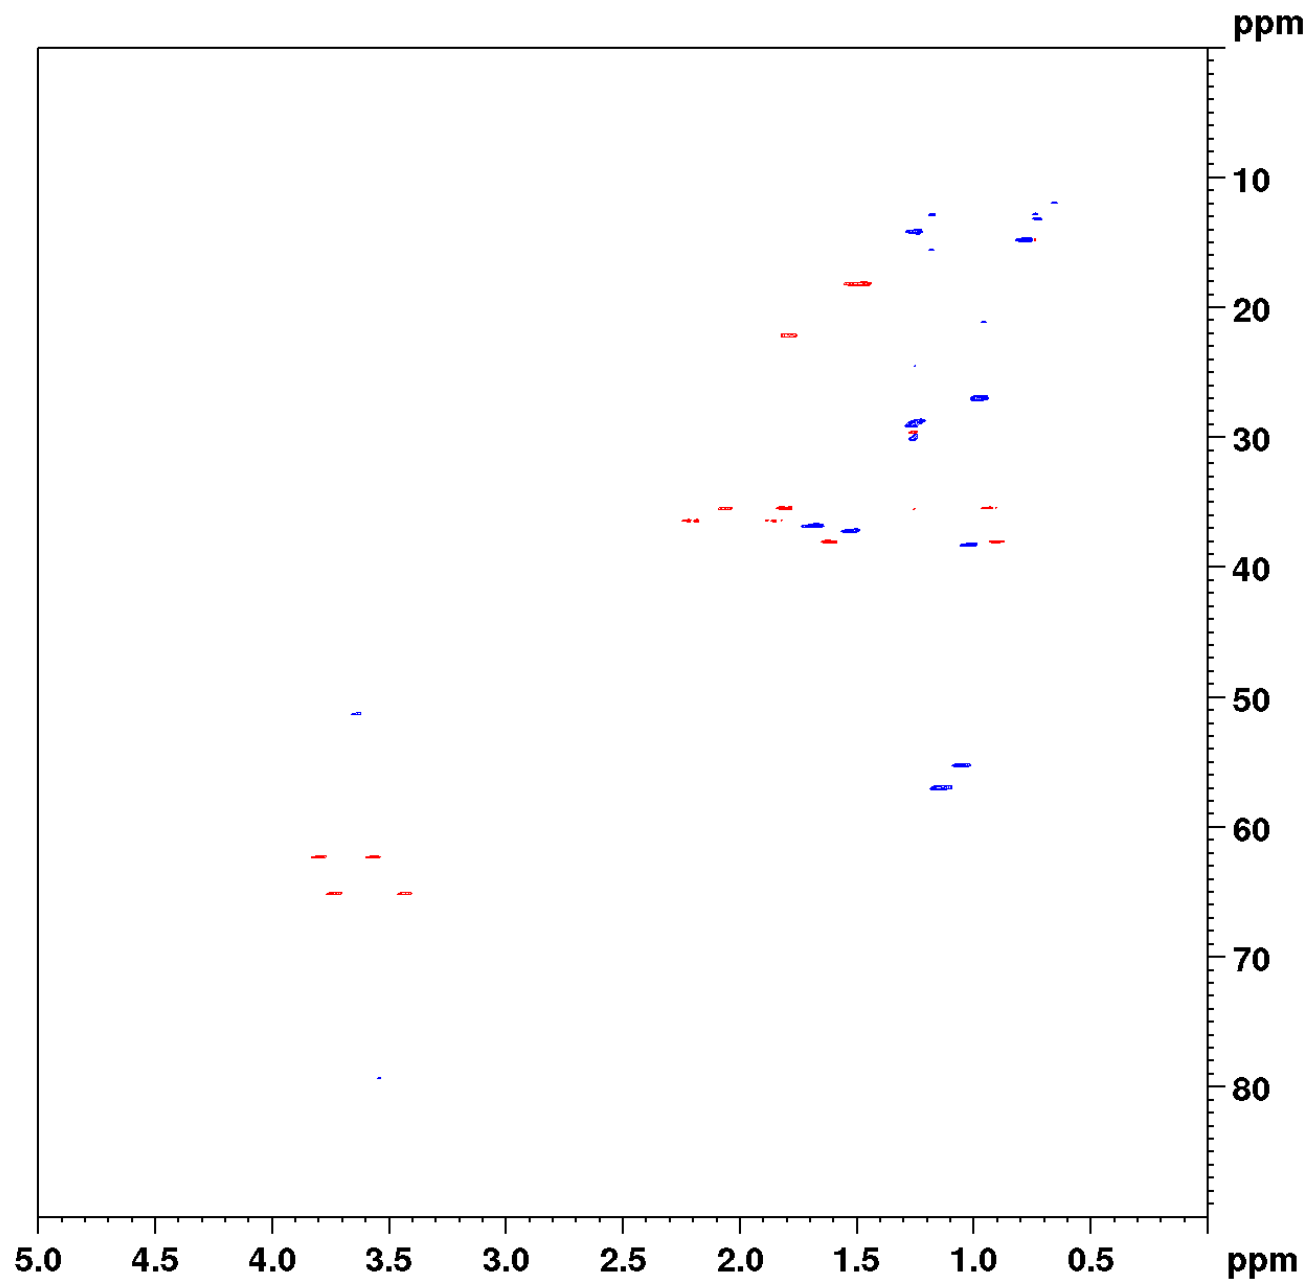

Fig. S6:

HMBC spectrum of compound **1**  
measured in chloroform- $d_1$

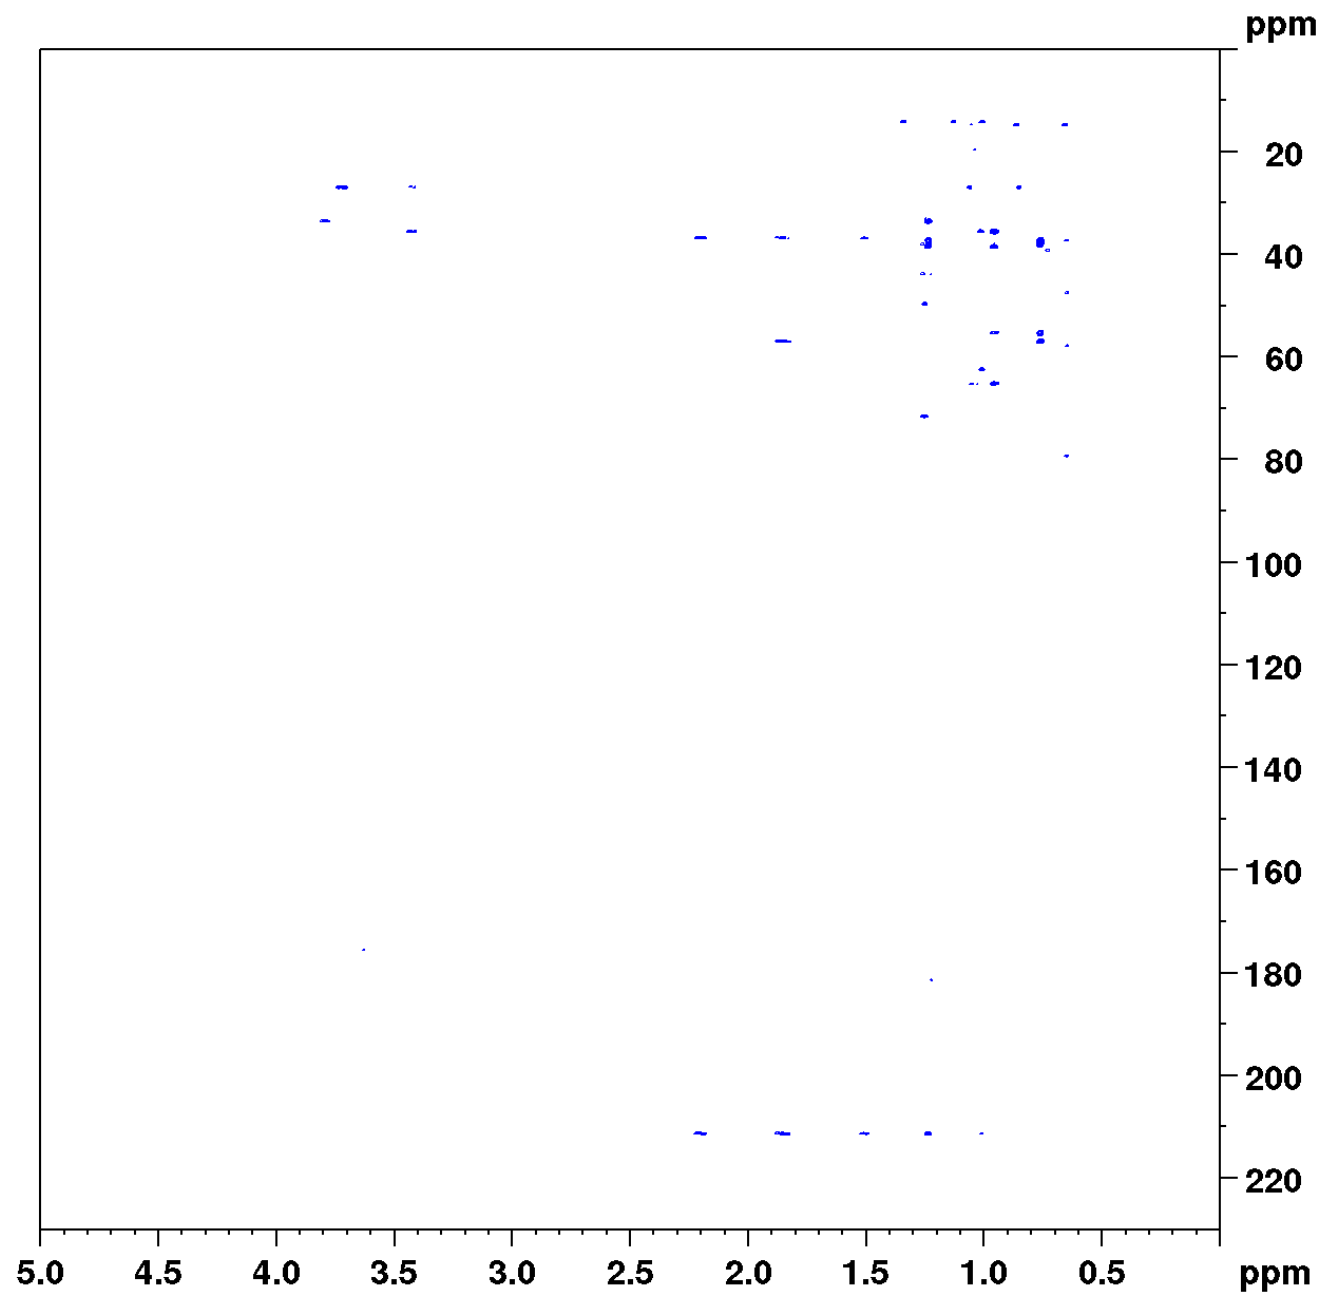

Fig. S7:

NOESY spectrum of compound **1**  
measured in chloroform- $d_1$

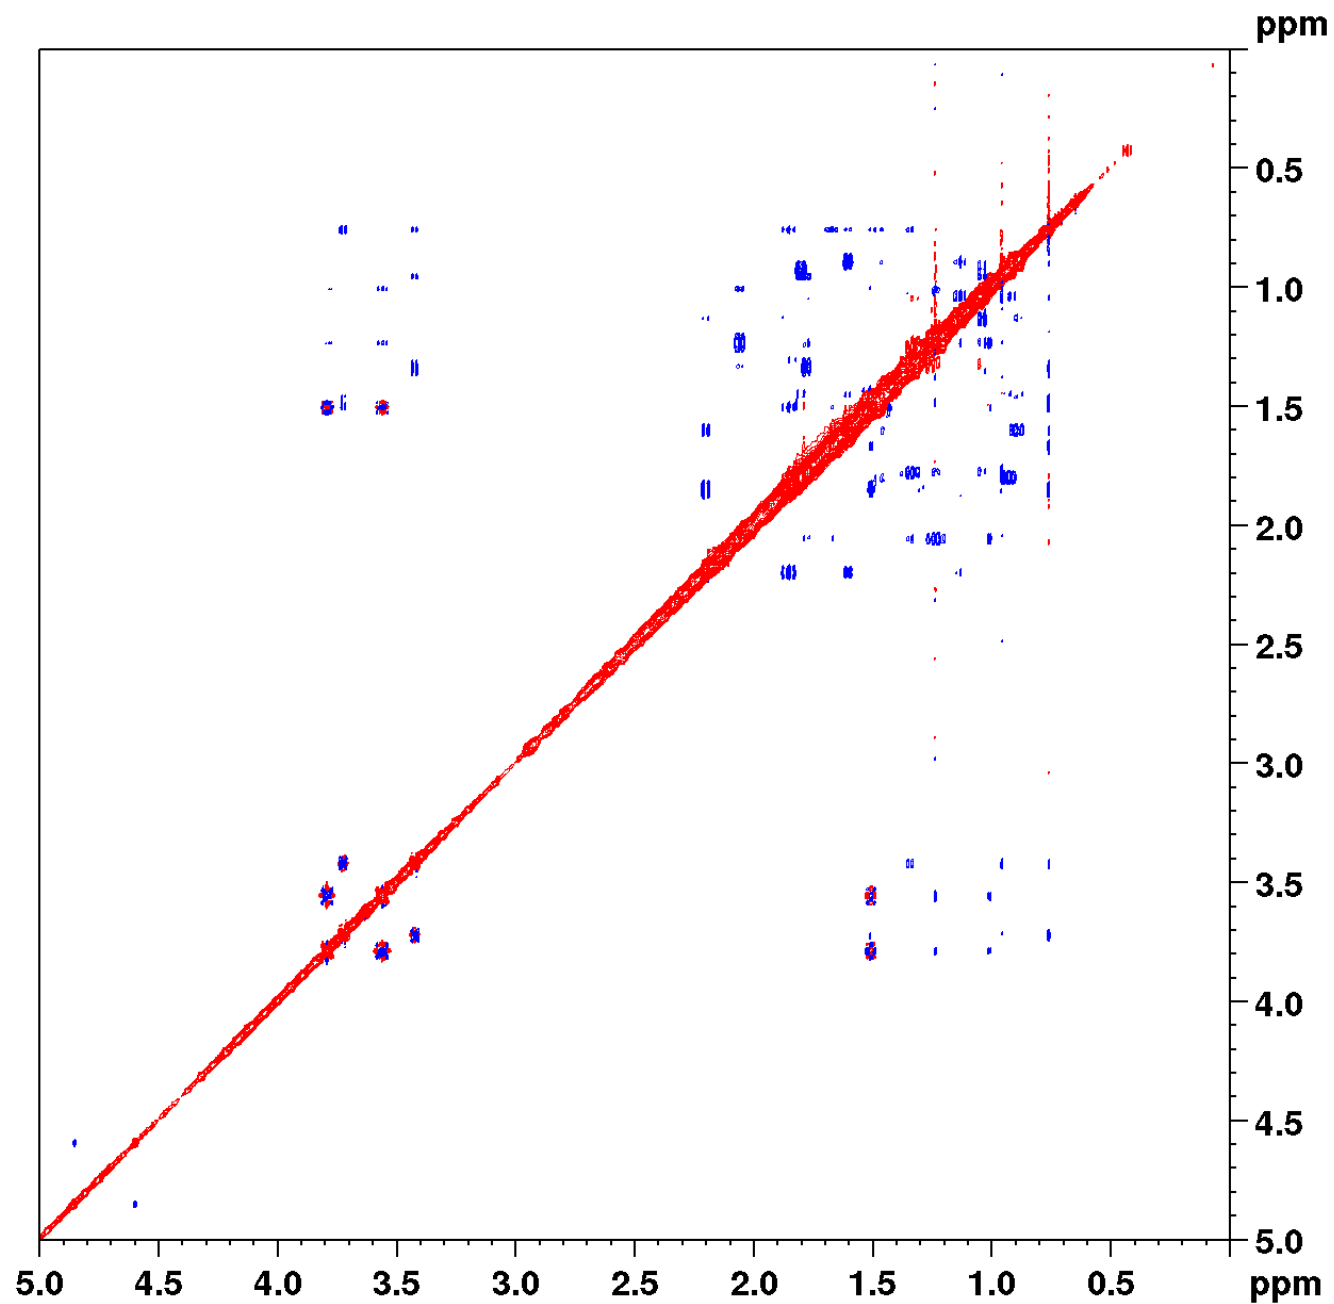

Supplement: s1 [file s1]
